# Supplementary material
Source: publisher site journal article supplement (https://www.dovepress.com/article/439629)
Supplement: Supplementary file 1 [file get_supplementary_file.php]

1. **Supplementary methods**
2. **Supplementary results**

**Supplementary methods**

**The model design and training strategies of nodule detection model**

**The design of detection model**

We adopted the Faster- Region convolutional neural network (RCNN) algorithm to detect nodule regions. To further improve the ability of detecting nodules with significant differences in sizes, the feature pyramid network (FPN) module was adopted as the neck between the ResNet-34 backbone and region proposal network (RPN) and RCNN detection heads. The model detected the nodule regions in a cascaded manner. After the ResNet-34 backbone and FPN generating multi-scale image features, the RPN head firstly predict the potential nodule regions, and pass the primary results into the RCNN head for the further background-nodule classification and nodule location regression. In the whole detection process, RPN head is mainly responsible for the high recall, and the RCNN head pay more attention to the precision of detection results.

In our experiments, we used the multi-scale features from 2nd-5th stages of ResNet-34. The FPN module supplied features of P2-P6 for RPN head and P2-P5 for RCNN head. The size of anchor is 32, 96, 160, 224, 288 for each feature scale. We set the aspect ratios of anchor as 0.6, 0.8, 1.0, 1.2, 1.4 to cover nodule regions with different shapes. The anchor aspect ratios were used for all the feature scales. To further improving the precision of nodule detection, we adopted Cascaded region of interest (ROI) head as our RCNN head to obtain the nodule detection with high-quality.

**The training strategy of detection model**

The suitable training strategy is important for accurate and generalizable detection models. Therefore, we paid more attention to explore more efficient training methods. In detail, we used the ImageNet pre-trained parameters for the initialization of ResNet-34 backbone and adopted warm-up learning rate strategy to blend the parts with/without pre-trained parameters. As a characteristic of two-staged detection algorithms, such as Faster-RCNN, the anchors need to be sampled for training RPN and RCNN heads to keep the balance of positive-negative categories. However, in our thyroid nodule detection mask, it’s usually that there is only one or no nodule in an image, which leads to the positive samples scarce and homogeneous. Our experiment revealed that it hampered the efficient training. As one solution for this issue, we randomly chose 16 frames from different videos and concatenated them in 4◊4 grid to generate one training sample. In this way, each sample contains 16 different nodules, which enables more efficient sampling operation and better model training. We built the nodule detection model using the Detectron2, which is an open-source toolbox for object detection.

Apart from that, we normalized the ultrasound data with means (23.35, 24.84, 25.87) and standard deviations (0.62, 0.63, 0.62). For each concatenation sample as described above, we randomly cropped its size as (0.8, 0.8) to translate the nodule locations. Other data augmentation strategies consist of random contrast in (0.5, 1.5), random brightness in (0.5, 1.5), and random saturation in (0.5, 1.5). We adopted multi-size training strategy, each time the training size was randomly chosen from (1000, 1100, 1200, 1300, 1400, 1500). Two TITIAN Xp GPUs were used for the training, and the batch per GPU is 2. We used SGD as the solver. The initial learning rate was 0.01, and was decayed at 18000th and 36000th iterations. We totally trained the detection models in 90000 iterations. When validating the performance of detection model, we scaled the ultrasound images to make its minimum size as 425.

**The model design and training strategies of nodule classification model**

The prediction of detection model was used for the training of classification model. As the input of convolutional neural network usually is a square shape, we cropped the nodule regions as a square patch, with the center of detected region as center, and the longest length of side as the length of square patch. Zeros were padded if the cropping touched the border of ultrasound image. The design and training of classification model is simpler than detection model. We divided the nodule classification into two stages, the first stage predicted the benign/malignant probability for each ultrasound images independently, and the second stage predicted the probability for an ultrasound video. We firstly trained the classification to predict the pathological results for each ultrasound image as accurate as possible. Then, with trained classification model parameters as initialization, we strengthened the classification model with an attention module to estimate the diagnosis importance for each frame, and aggregated the prediction probabilities of each frame with corresponding diagnosis importance.

In training process, we used random translation in (0.3, 0.3) and random lightness in (0.5, 1.5) for first-stage classification training, and only random lightness in (0.5, 1.5) for the second-stage classification training. For each time, the frame length of ultrasound video is 16. The cropped nodule patches were rescaled as 224◊224 and normalized as the same way as in detection model building. Stochastic gradient descent was adopted as the solver. The initial learning rates was 0.01 and 0.001 for the first-stage and second-stage classification, and both decayed to 1e-5 using cosine annealing schedule. With the batch size as 16, we trained the classification models in 20 epochs.

**Supplementary results**

**Comparison between the AI diagnosis model and radiologists**

The diagnostic performance of our proposed AI diagnostic model was superior to the junior radiologist (*P* = 0.016). Meanwhile, the performance of AI model can match the experienced radiologist (*P* = 0.281) (Supplementary Figure 1).


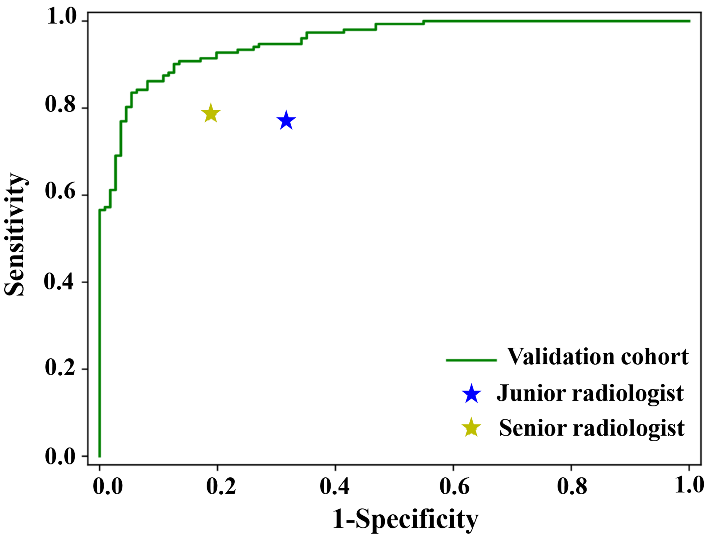


**Supplementary Figure 1. Comparison of diagnosis performance between the diagnosis model and radiologists.** In the validation cohort, the sensitivity and specificity of the junior and experienced radiologists were 76.9% vs 78.3%, and 68.4% vs 81.1%, respectively.
